# Supplementary material
Source: Springer Nature journal article supplement (https://www.springermedizin.de/resource/supplementary/12889_2009_1954_MOESM1_ESM.pdf/9485450)

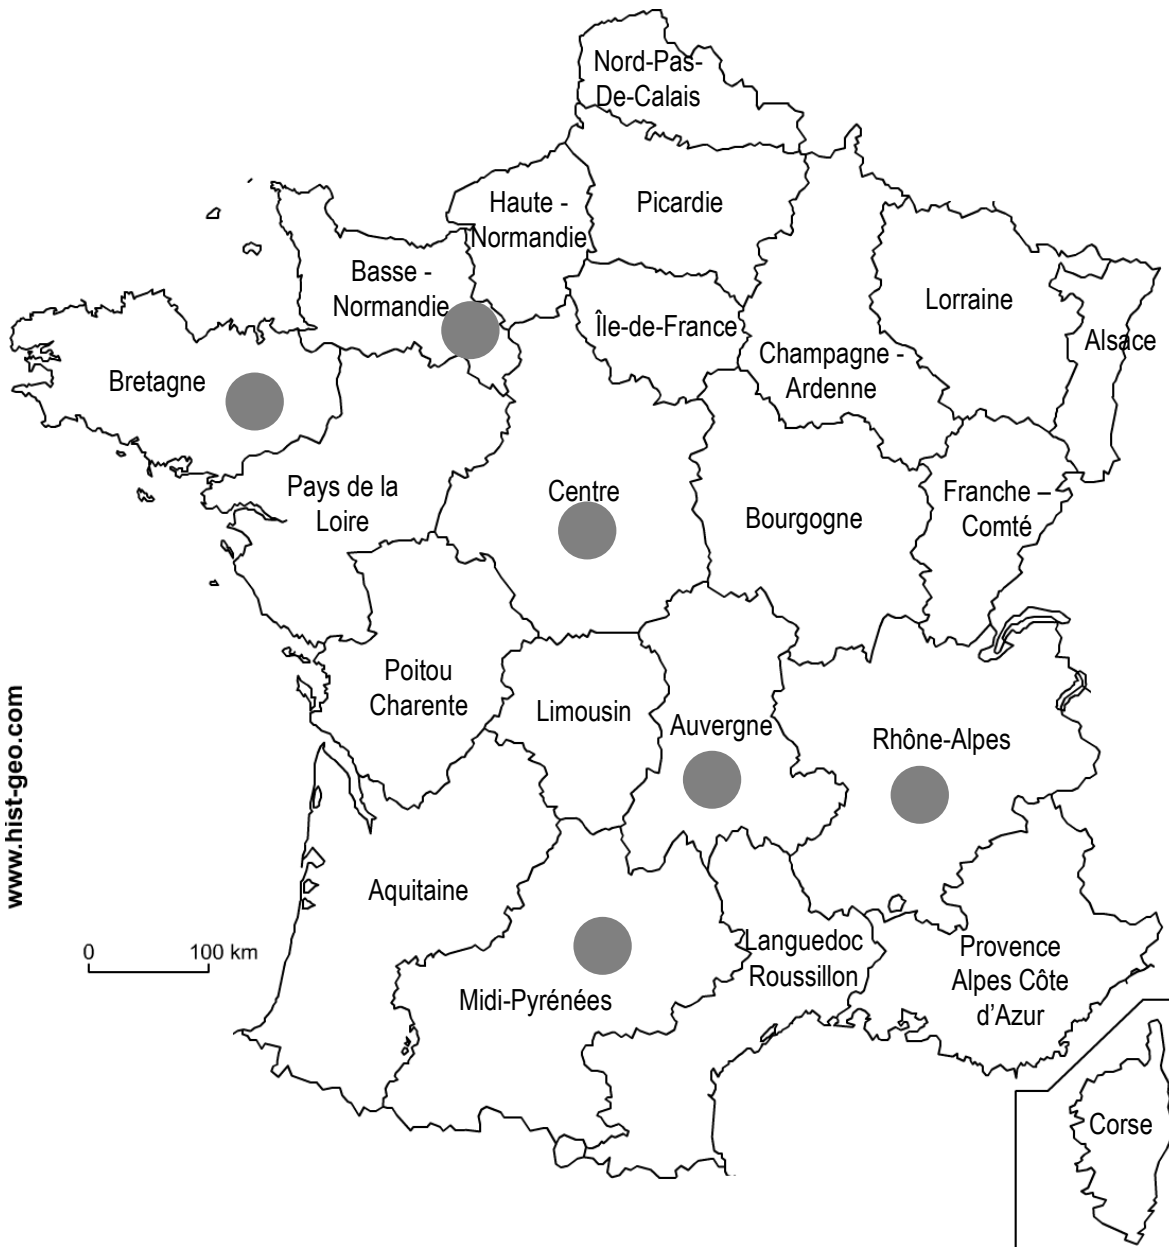

2008-2011:  
6 French regions,  
115 primary schools:  
11,000 pupils and their  
family, 650 teachers.

Supplement: MOESM1 [file 9485450]
